# Supplementary material
Source: PubMed Central journal article supplement (PMC9806619)
Supplement: kiac460_supplementary_data.pdf [file kiac460_supplementary_data.pdf]

# Supporting Fig. S1.

**A**

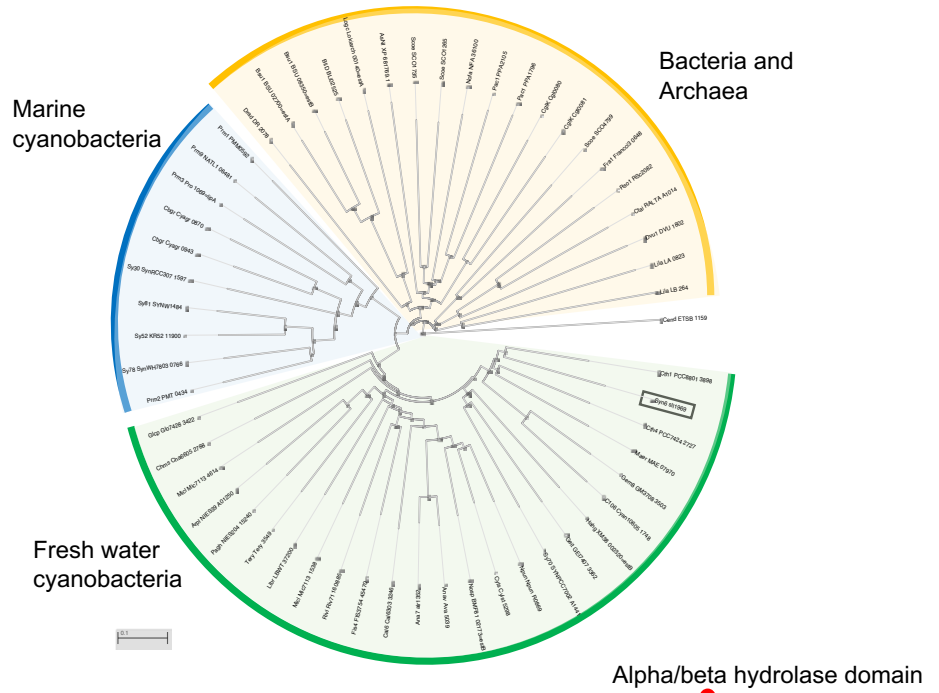

**B**

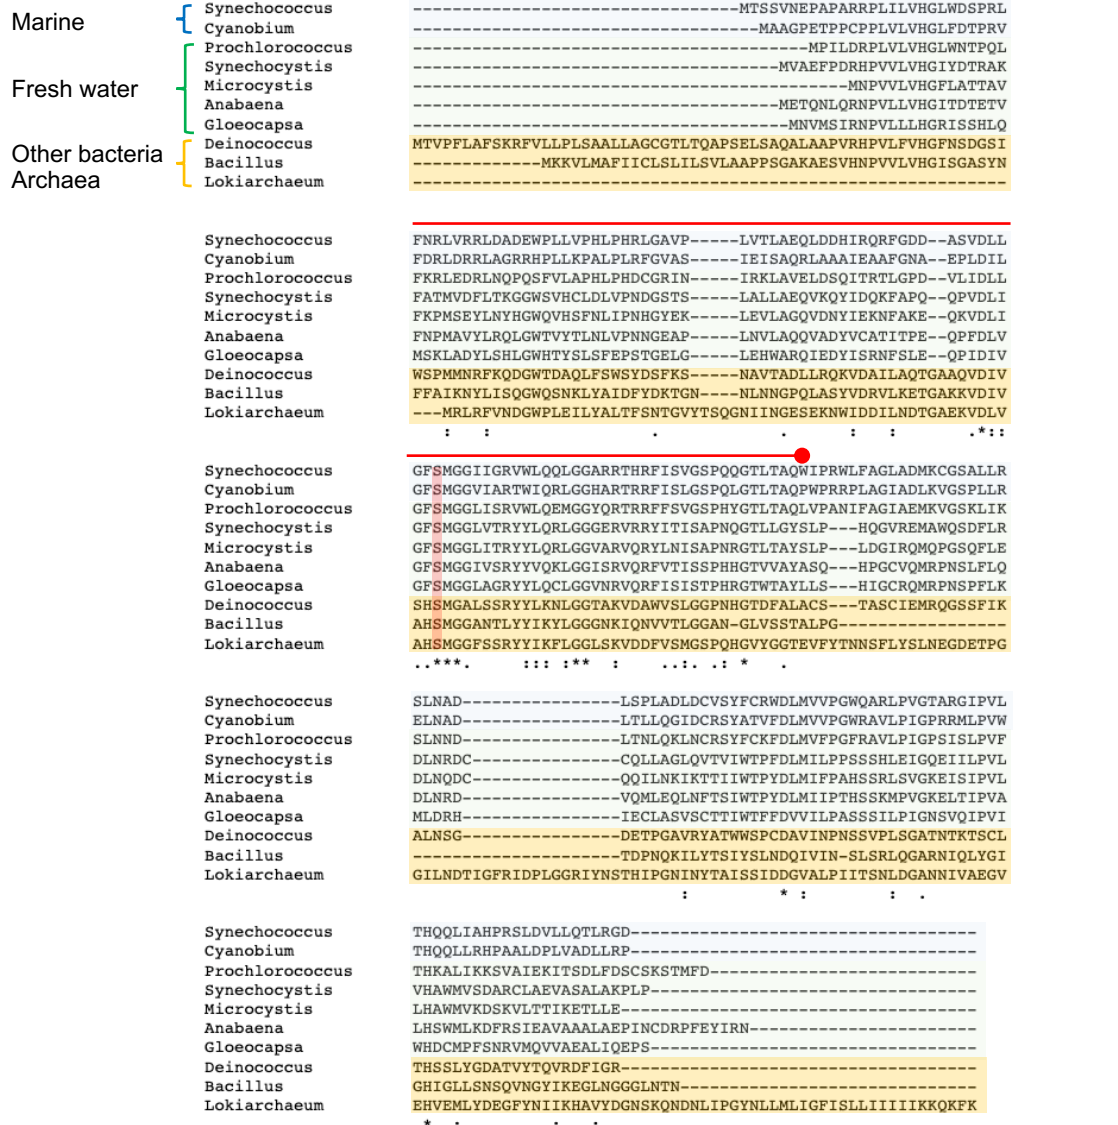

Supporting Fig. S1. Phylogenetic analysis of LipA proteins. (A) Neighbor-joining tree of LipA proteins. Protein sequences were obtained from the Gclust server (<http://gclust.c.u-tokyo.ac.jp/>) established by Prof. Naoki Sato (The University of Tokyo). (B) Alignment of amino acid sequence of Sll1969 with those of homologues found in other cyanobacteria (*Synechococcus*; *Synechococcus* sp. WH 7803, *Cyanobium*; *Cyanobium gracile* PCC 6307, *Prochlorococcus*; *Prochlorococcus marinus* CCMP1375, *Synechocystis*; *Synechocystis* sp. PCC 6803, *Microcystis*; *Microcystis aeruginosa* NIES 843, *Anabaena*; *Anabaena* sp. PCC 7120, and *Gloeocapsa*; *Gloeocapsa* sp. PCC 7428), bacteria (*Deinococcus*; *Deinococcus radiodurans* R1 and *Bacillus*; *Bacillus subtilis* 168) and archaea (*Lokiarchaeum*; *Lokiarchaeum* sp. GC1475).

## Supporting Fig. S2.

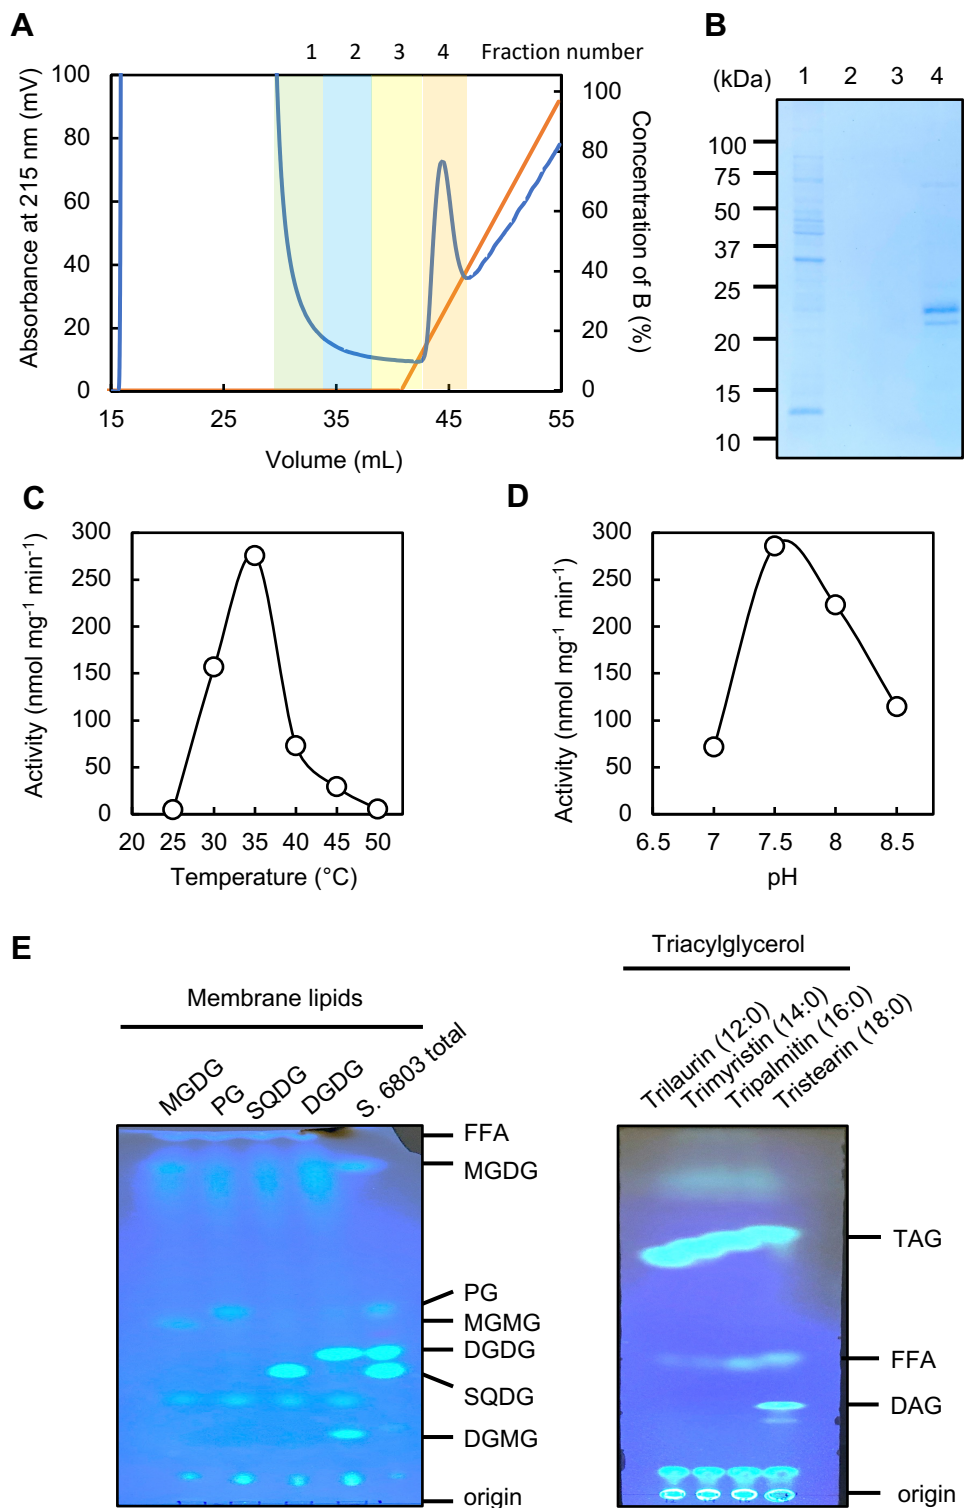

Supporting Fig. S2. Purification and characterization of recombinant LipA protein with a 6 x His-tag expressed in *Escherichia* (*E.*) *coli* cells. (A) Total extracts from *E. coli* cells expressing recombinant LipA protein were used with the AKTA start purification system. Blue line indicates absorbance at 215 nm (values shown at left y-axis) and orange line indicates a gradient concentration of B (%) (values shown at right y-axis). Upper number indicates numbers for fractions taken and analyzed by SDS-PAGE (B). 0.4 mM p-phenyl stearate was used as a substrate for determination of temperature (C) and pH (D) dependencies of LipA activity. (E) Pictures of thin-layer chromatography (TLC) plates. After the reaction with LipA and each purified lipid, the reaction products were extracted and analyzed by TLC.

## Supporting Fig. S3.

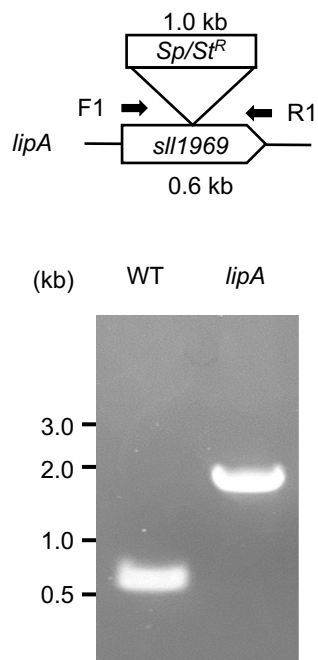

Supporting Fig. S3. Segregation of disrupted *sll1969* gene in *lipA* cells. The complete insertion of the spectinomycin/streptomycin-resistant gene cassette (*Sp/St<sup>R</sup>*) into the middle of *sll1969* gene in all chromosomal copies of the genome was confirmed by PCR. Genomic DNA extracted from wild-type and *lipA* cells was used for PCR with a pair of primers shown in the upper picture as F1 and R1.
